# Supplementary material for: Identification of key genes and biological pathways in Chinese lung cancer population using bioinformatics analysis
Source: PubMed Central journal article supplement (PMC8812315; doi:10.7717/peerj.12731), 2022-01-31
Supplement: peerj-10-12731-s001.pdf [file peerj-10-12731-s001.pdf]

**A**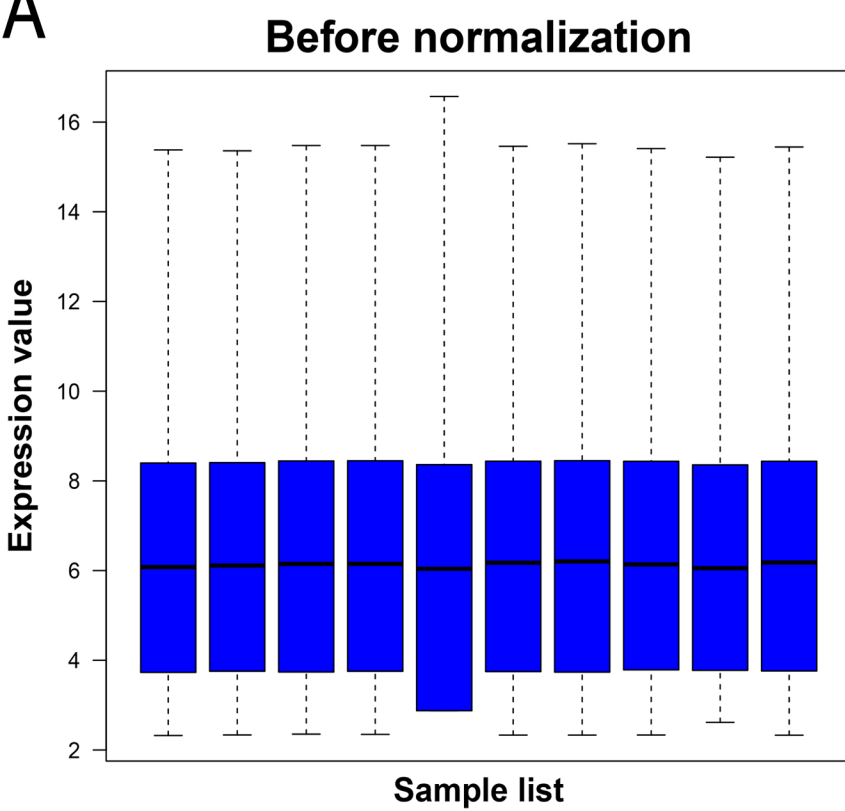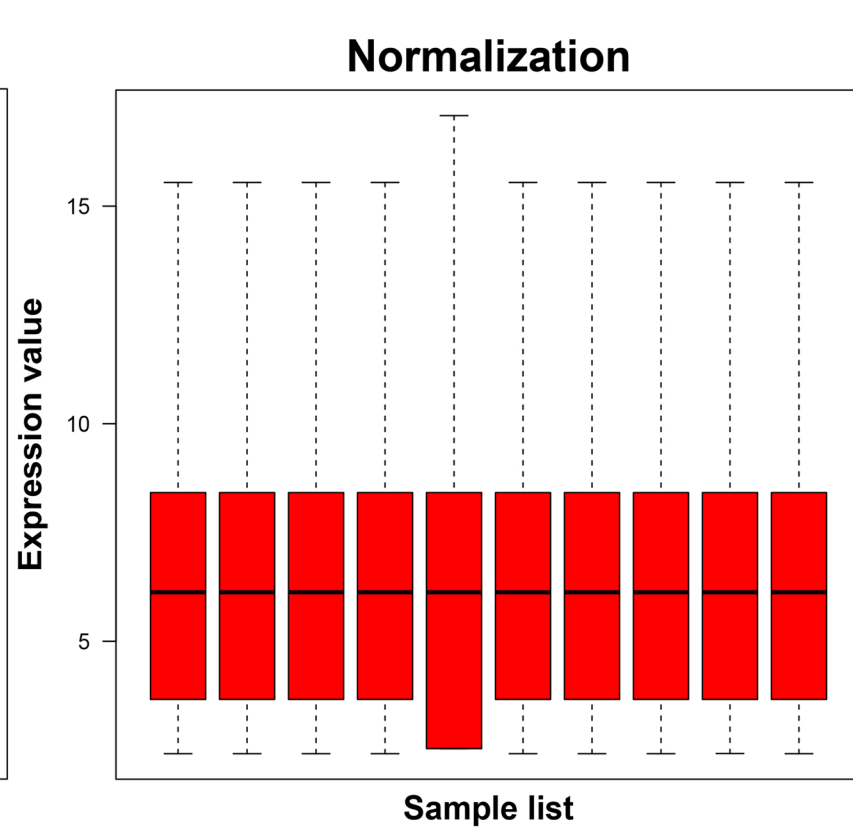

GSE136043

**C**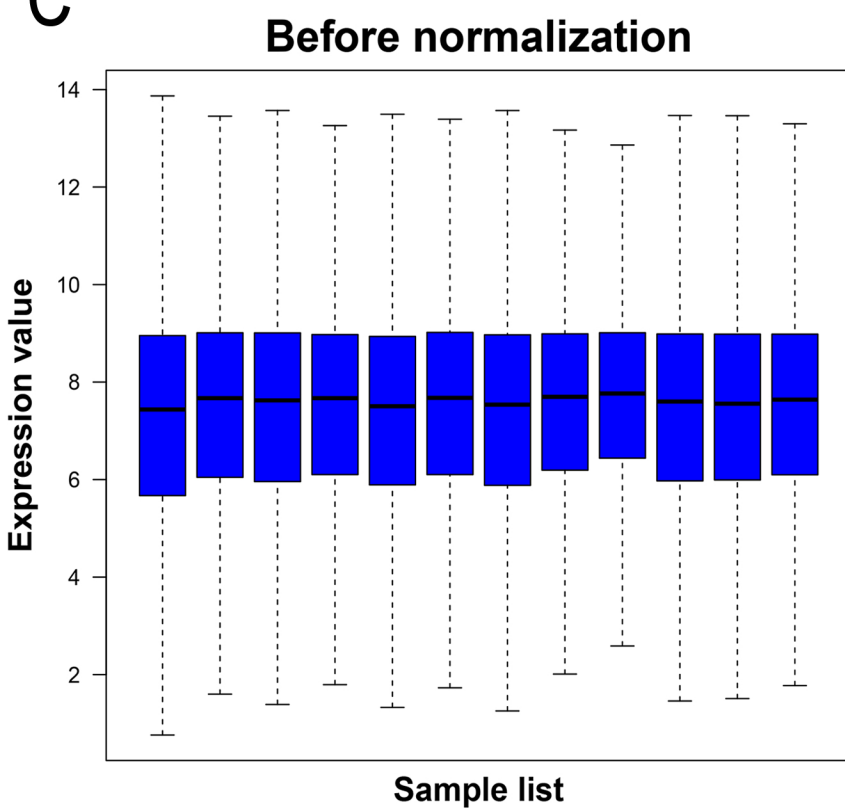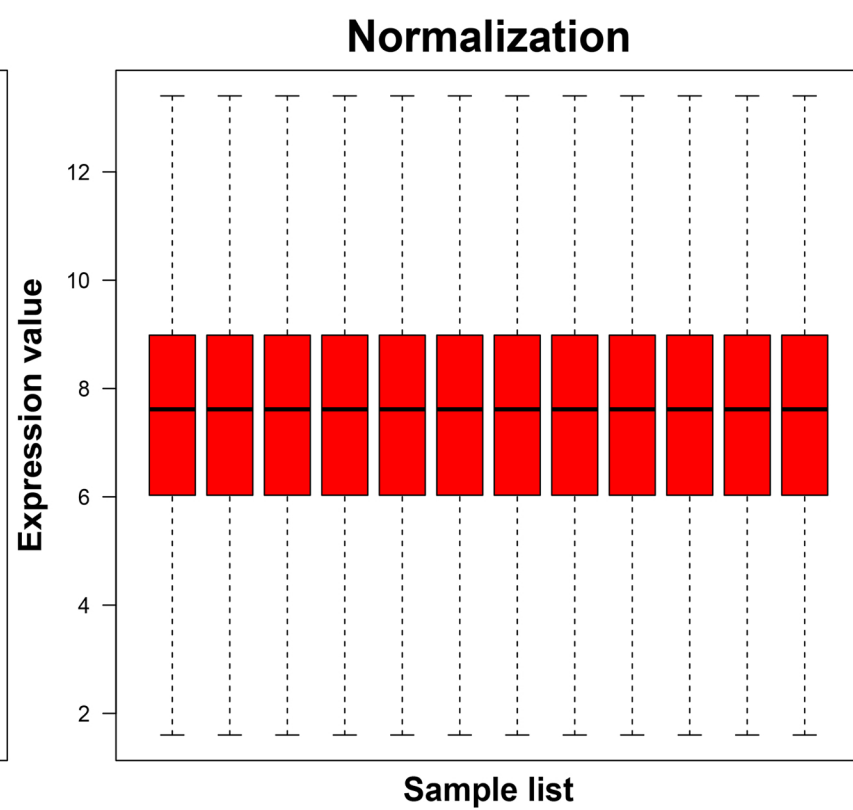

GSE118370

**E**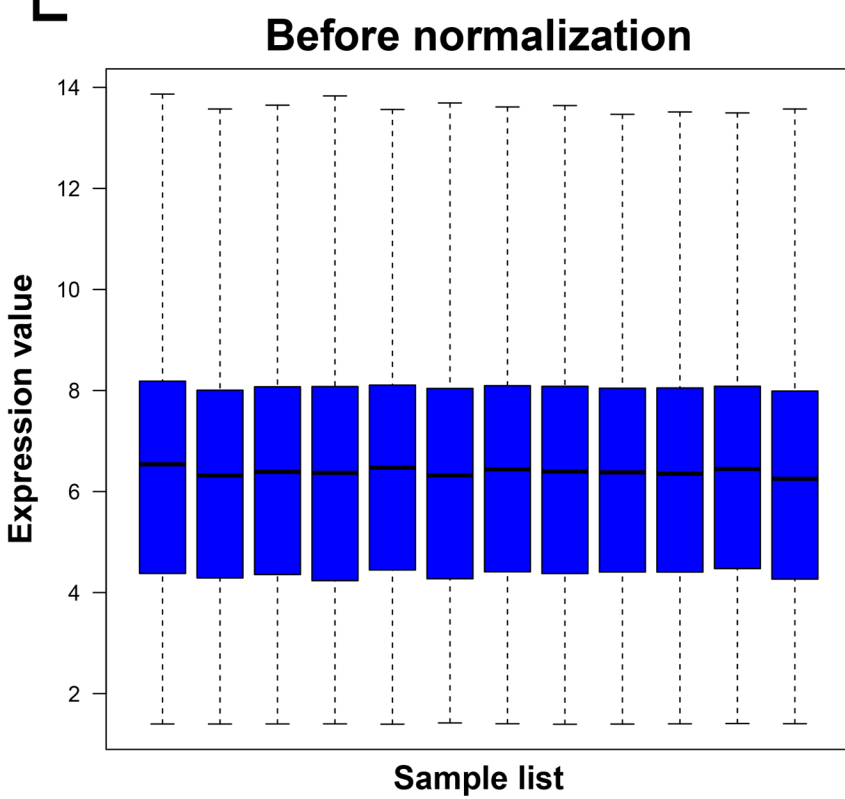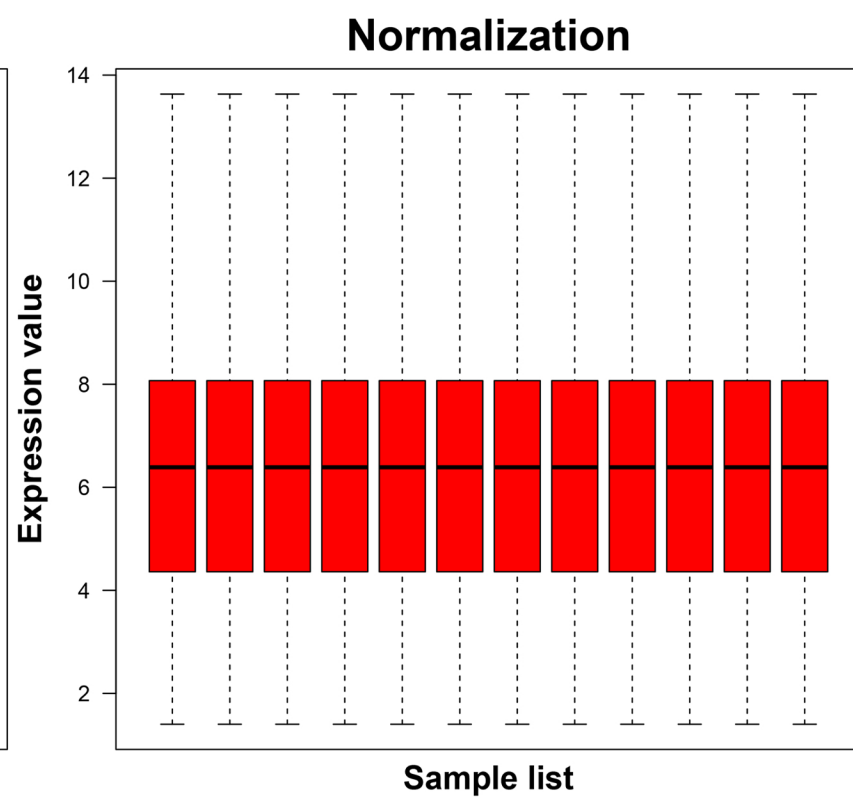

GSE85716

**B**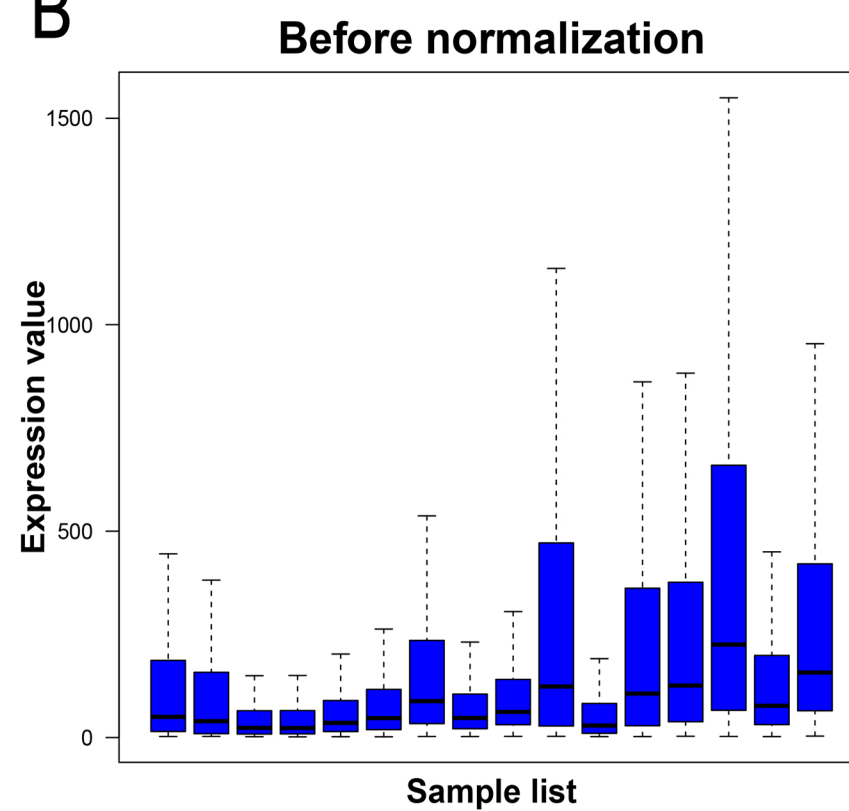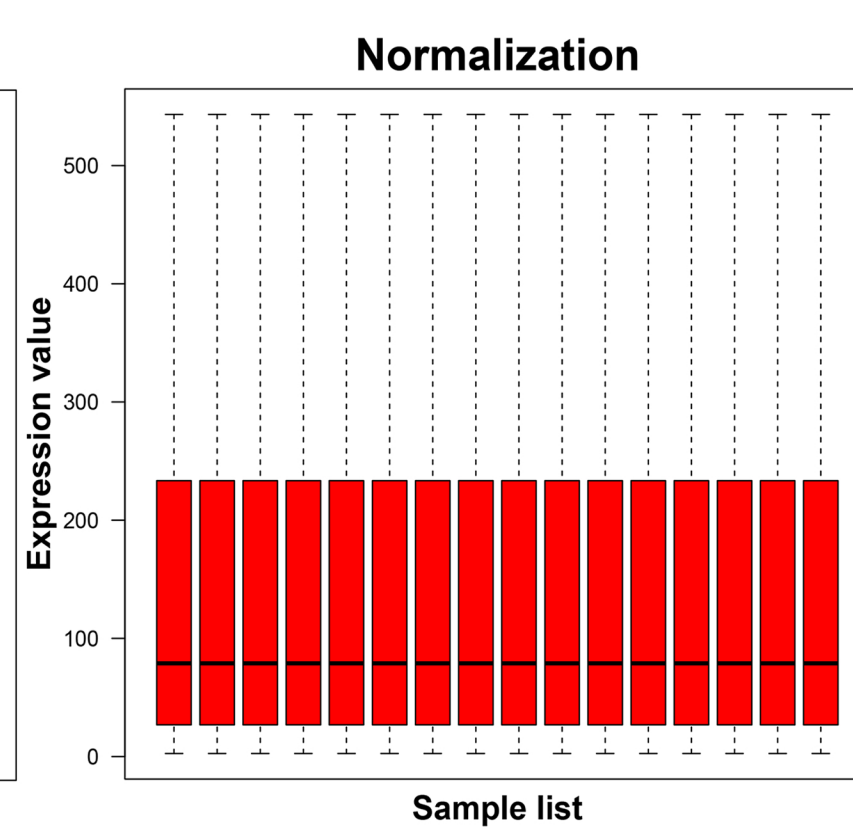

GSE130779

**D**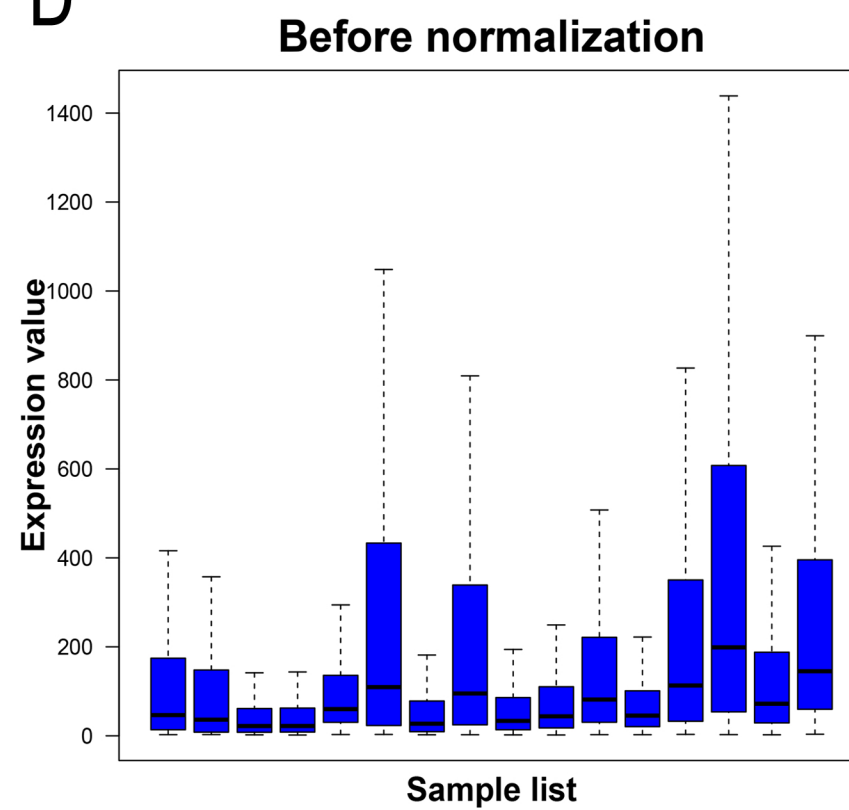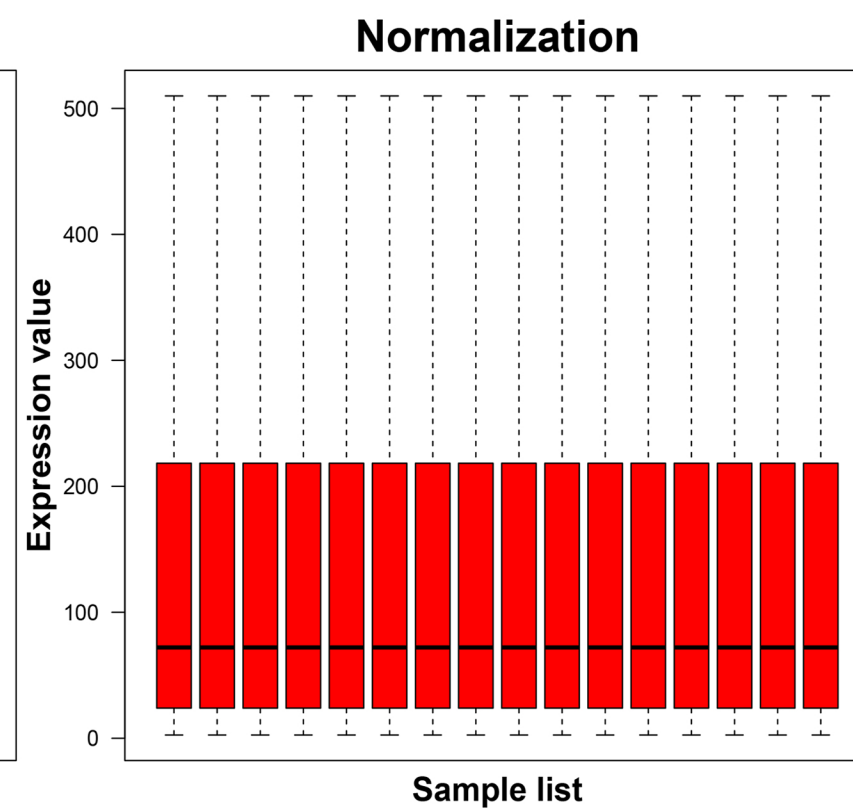

GSE85841

**F**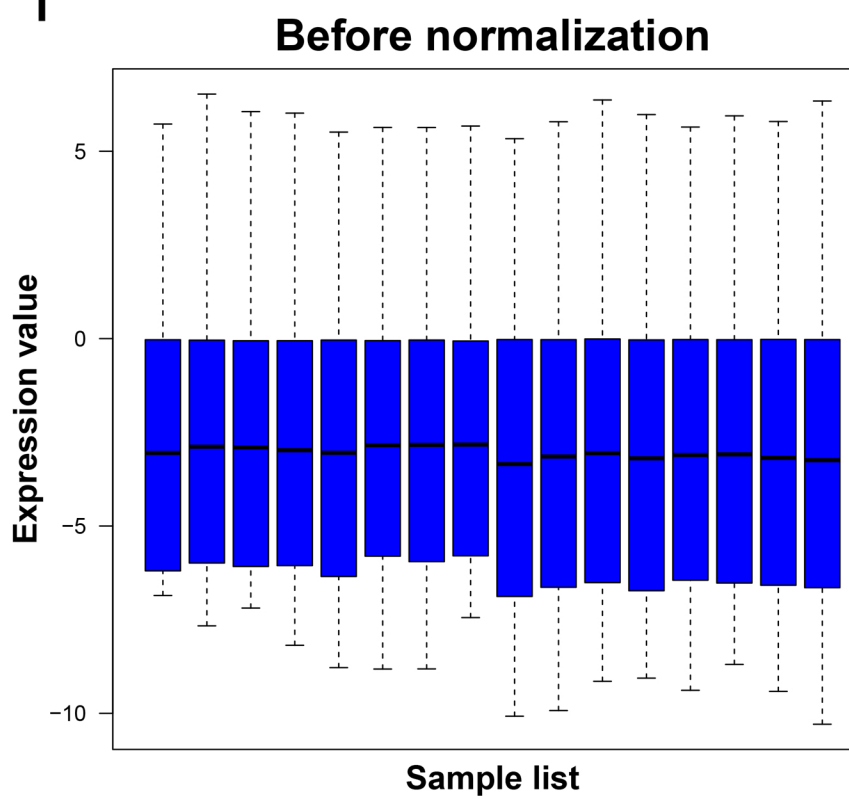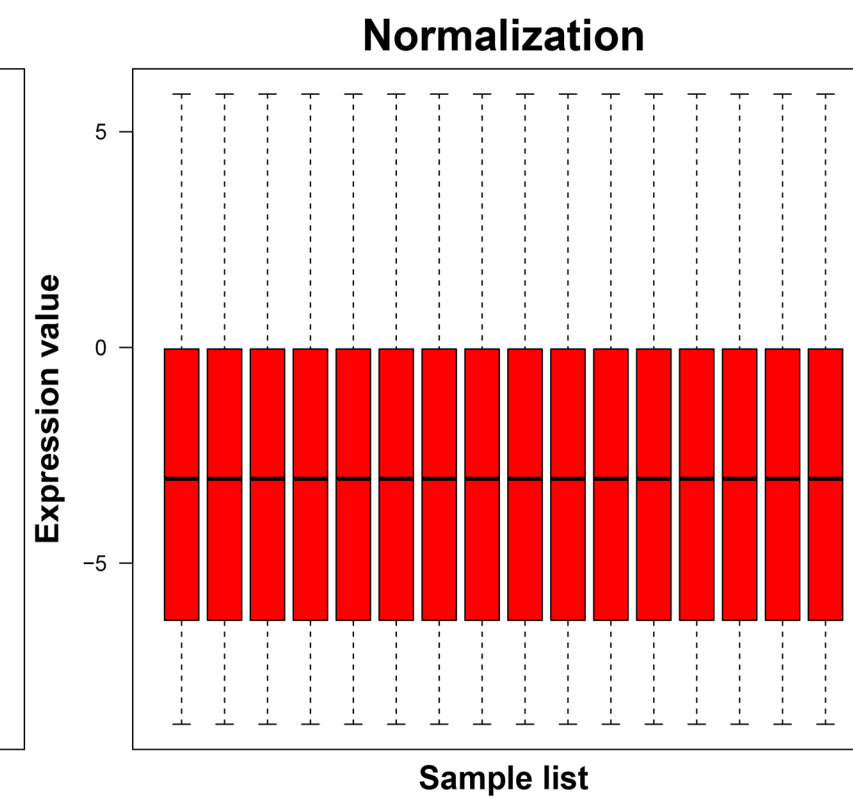

GSE89039
